# Supplementary material for: Phylogeny of the manta and devilrays (Chondrichthyes: mobulidae), with an updated taxonomic arrangement for the family
Source: Oxford University Press journal article supplement (doi:10.1093/zoolinnean/zlx018), 2017-03-24
Supplement: zlx018_suppl_figure_1_suppinfo.pdf [file zlx018_suppl_figure_1_suppinfo.pdf]

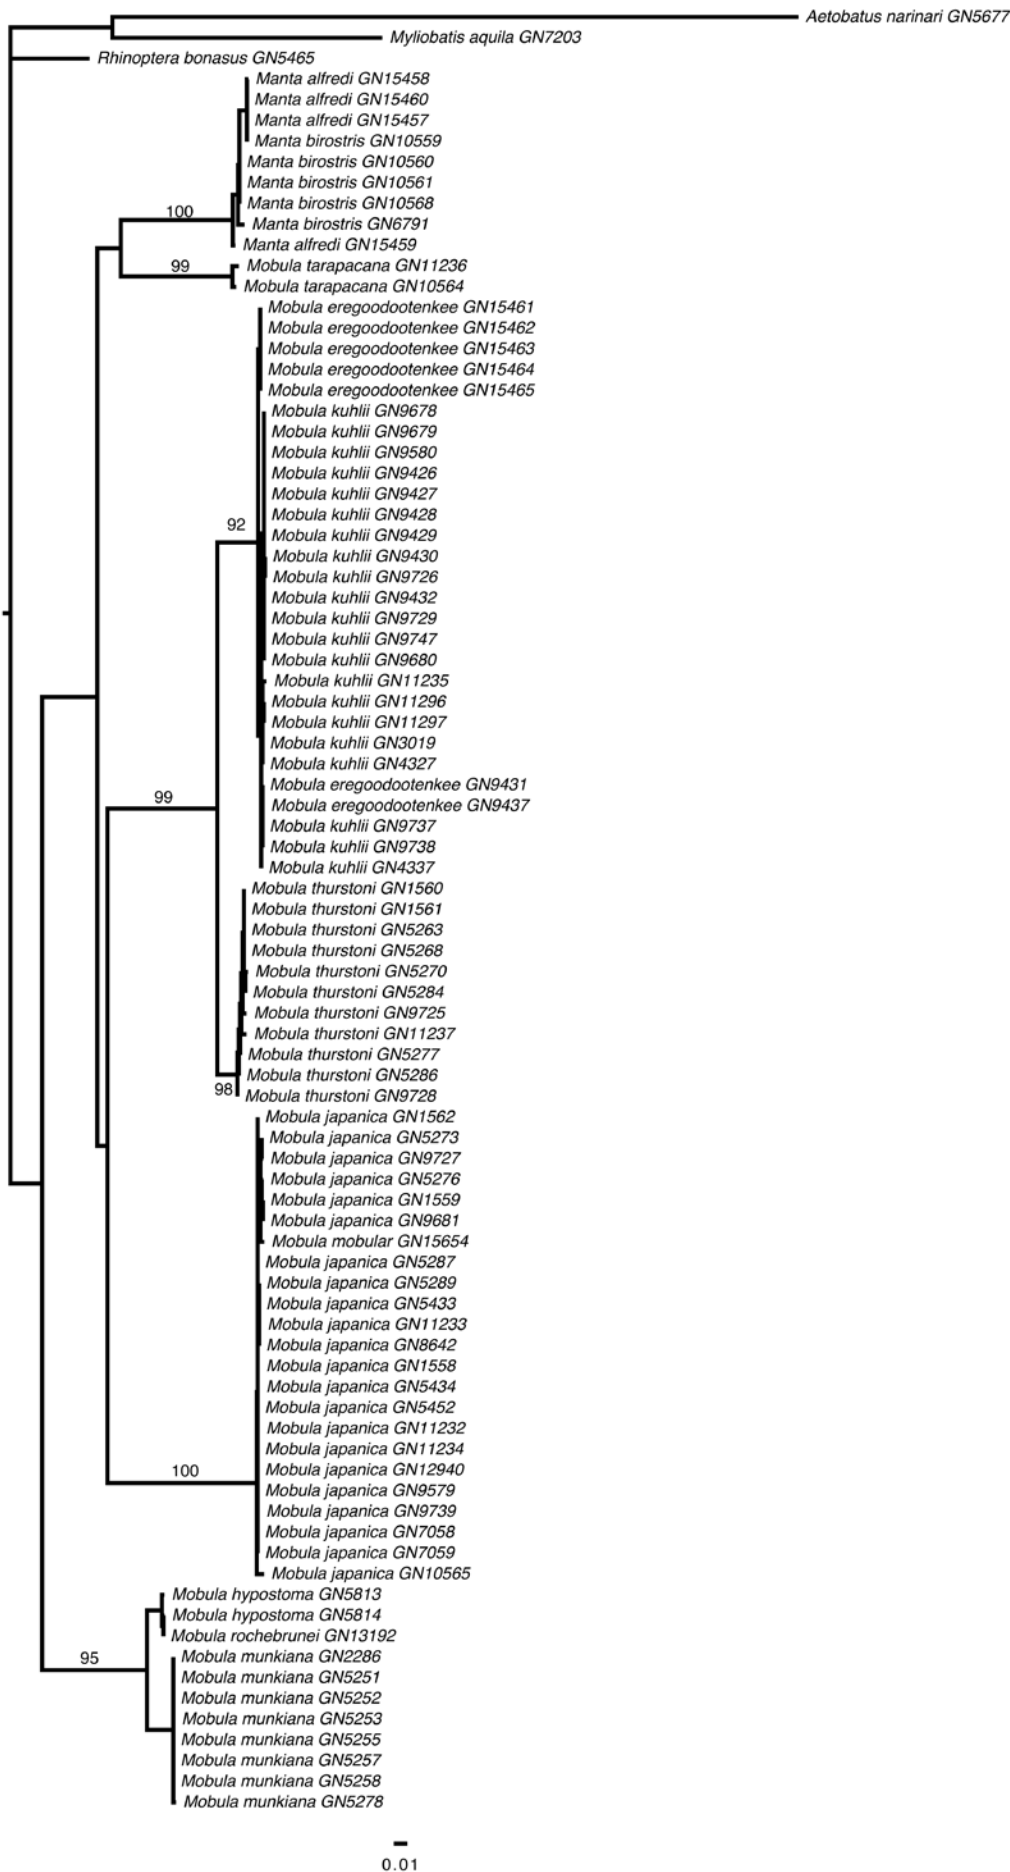

Figure 1. Maximum Likelihood tree showing nominal identifications of mobulid specimens and the relationships among them, relative to three outgroups (*Aetobatus narinari*, *Myliobatis aquila* and *Rhinoptera bonasus*). The tree was derived from an alignment of mitochondrial NADH2 sequences (1044 sites) under a TVM+I+G model of molecular evolution.
