# Supplementary material for: Phylogeny of the manta and devilrays (Chondrichthyes: mobulidae), with an updated taxonomic arrangement for the family
Source: Oxford University Press journal article supplement (doi:10.1093/zoolinnean/zlx018), 2017-03-24
Supplement: zlx018_suppl_table_1_suppinfo.docx [file zlx018_suppl_table_1_suppinfo.docx]

Table 1. Best partitioning scheme for the protein coding components of the mitochondrial genomes.

| Model | -lnL | # parameters | AICc | Subset IDs |
| --- | --- | --- | --- | --- |
| GTR+I+G | 4415.9 | 10 | 8851.97 | ND1 codon1, ATP6 codon1, ND3 codon1, ND4L codon1, ND5 codon1 |
| GTR+I+G | 3240.18 | 10 | 6500.48 | ND1 codon2, ND4 codon2, ND5 codon2, Cytb codon2 |
| TrN+I+G | 4551.37 | 7 | 9116.9 | ND1 codon3, ND2 codon3 |
| TVM+G | 1521.25 | 8 | 3058.87 | ND2 codon1, ATP8 codon2 |
| TVM+I | 1586.13 | 8 | 3188.45 | ND2 codon2, ATP6 codon2, ND3 codon2, ND4L codon2 |
| TIM+I+G | 1609.08 | 8 | 3234.36 | CO1 codon1, CO2 codon1 |
| HKY+I | 1492.07 | 5 | 2994.2 | CO1 codon2, CO2 codon2, CO3 codon2 |
| TIM+G | 3457.05 | 7 | 6928.33 | CO1 codon3 |
| TIM+G | 4540.29 | 7 | 9094.74 | CO2 codon3, ATP8 codon3, ATP6 codon3, CO3 codon3 |
| K81uf+I+G | 2793.08 | 7 | 5600.28 | ATP8 codon1, ND4 codon1, Cytb codon1 |
| SYM+I+G | 677.36 | 7 | 1369.17 | CO3 codon1 |
| TrN+I | 741.15 | 6 | 1495.07 | ND3 codon3 |
| TrN+I+G | 7021.73 | 7 | 14057.56 | ND4L codon3, ND5 codon3, Cytb codon3 |
| GTR+I+G | 3157.41 | 10 | 6335.32 | ND4 codon3 |
| TrN+G | 478.89 | 6 | 970.28 | ND6 codon1 |
| K81uf+I | 356.74 | 6 | 725.98 | ND6 codon2 |
| TrN+G | 1090.43 | 6 | 2193.36 | ND6 codon3 |
